# Supplementary material for: Species Diversity of Cordyceps-Like Fungi in the Tiankeng Karst Region of China
Source: PubMed Central journal article supplement (PMC9603550; doi:10.1128/spectrum.01975-22), 2022-09-12
Supplement: spectrum.01975-22-s0001.pdf [file spectrum.01975-22-s0001.pdf]

Table S1. Primers information for 5 DNA sequences

| Name      | Length | Direction | Sequence 5'-3'          |
|-----------|--------|-----------|-------------------------|
| ITS5      | 22     | forward   | GGAAGTAAAAGTCGTAACAAGG  |
| ITS4      | 20     | reverse   | TCCTCCGCTTATTGATATGC    |
| NS1       | 19     | forward   | GTAGTCATATGCTTGCT C     |
| NS4       | 20     | reverse   | CTCCGTCAATTCCTTAAAG     |
| LROR      | 17     | forward   | ACCCGCTGAACTTAAGC       |
| LR5       | 17     | reverse   | TCCTGAGGGAAACTTCG       |
| CRPB1     | 20     | forward   | CAYCCWGGYTTYATCAAGAA    |
| RPB1Cr    | 23     | reverse   | CCNGCDATNTCRTRTCCATRTA  |
| RPB2-5F3  | 20     | forward   | GACGACCGTGATCACTTTGG    |
| RPB2-7Cr2 | 20     | reverse   | CCCATGGCCTGTTGCCCAT     |
| 983F      | 23     | forward   | GCYCCYGGHCAYCGTGAYTTYAT |
| 2218R     | 23     | reverse   | ATGACACCRCRGCRCRGTGTG   |
